# Supplementary material
Source: PubMed Central journal article supplement (PMC2669372)
Supplement: 0901573106_0901573106SI.pdf [file 0901573106_0901573106SI.pdf]

# Supporting Information

Arashiro et al. 10.1073/pnas.0901573106

## SI Text

**RNA Isolation.** The muscle tissue was ground into fine powder in dry ice. Then, 6 ml of TRIReagent was added, homogenized for 1 min and the homogenate was split into 4 different tubes. After the incubation for 5 min, 300  $\mu$ l of chloroform was added and the solution was shaken vigorously for 1 min. The tubes were incubated for 15 min at room temperature and then centrifuged at  $12,000 \times g$  for 15 min at 4 °C. The supernatant was transferred to a fresh tube, 750  $\mu$ l of isopropanol was added and mixed. After the incubation for 10 min at room temperature, the solution was centrifuged at  $12,000 \times g$  for 15 min at 4 °C for RNA precipitation. The RNA pellets from the 4 tubes were mixed and washed with 1-ml 75% ethanol. The pellets were resuspended in nuclease-free water, mixed by pipettation, and incubated at 55 °C for 15 min. The RNA quality was observed through gel electrophoresis and Experion (Bio-Rad).

**Microarray Assay.** One microgram of total RNA was copied by reverse transcriptase using a T7-Oligo(dT) Promoter Primer and SuperScript II in the first-strand cDNA synthesis reaction. Following RNase H-mediated second-strand cDNA synthesis, the double-stranded cDNA was purified using a "Sample Cleanup Module" kit (Affymetrix). The cDNA served as a template in the subsequent in vitro transcription reaction. The in vitro transcription was carried out at 37 °C for 16 h in the presence of T7 RNA Polymerase and a biotinylated nucleotide analog/ribonucleotide mix for complementary RNA (cRNA) amplification and biotin labeling. The biotinylated cRNA was purified with a "Sample Cleanup Module" kit (Affymetrix) and quantified (NanoDrop company). Twenty micrograms of cRNA was fragmented randomly to 35 to 200 bases at 94 °C for 35 min. Fifteen micrograms of fragmented cRNA was hybridized to U133 Plus 2.0 chips for 16 h at 45 °C with rotation. The chips were washed and stained by the Affymetrix Fluidics Station 450, using instructions and reagents provided by Affymetrix. This step involves removal of nonhybridized probes and incubation with Streptavidin Phycoerythrin to detect bound probes.

**Microarray Data Analysis.** Each sample transcriptome profile is regarded as a 54,675-dimensional vector of measured probe-expression signals. There were a total of 15 individual sample profiles: 5 control, 5 asymptomatic, 5 affected. Asymptomatic sample number 14 was excluded from subsequent analysis because less than 5% of its total probes had a "present" Affymetrix detection call.

The entire dataset was normalized sample-wise by linear

regression to the reference sample with the highest average linear correlation against all other samples. This reference sample was control sample number 3.

A probe-by-probe differential fold analysis was performed between any 2 sample populations (control vs. asymptomatic, control vs. affected, asymptomatic vs. affected) using a geometric logarithmic-fold method on the normalized dataset with the minimal probe-signal threshold set to 50 (1, 2). The difference in average logarithmic signals (AvgLF) of a microarray probe-gene between the 2 sample populations was calculated. If a given probe has normalized signals  $50 \leq a_1 \leq a_2 \leq \dots \leq a_J$  and  $50 \leq b_1 \leq b_2 \leq \dots \leq b_K$  in populations A and B, respectively, then AvgLF of B relative to A is defined as  $\text{mean}(\log(b's)) - \text{mean}(\log(a's))$ . Furthermore, we define NoisLF as the maximal difference in logarithmic signals from a common population. In this example, NoisLF for the probe in A is  $\text{mean}(\log(aJ_2)) - \text{mean}(\log(aJ_1))$ , where  $J_1$  ranges from 1 to  $[J/2]$ ,  $J_2$  range from  $[J/2]+1$  to  $J$  (if  $J$  is even) or  $[J/2]+2$  to  $J$  (if  $J$  is odd), where  $[J/2]$  is the largest integer less than or equal to  $J/2$ . An AvgLF value for a probe is considered significant if its magnitude exceeds  $\log(2)$  and the NoisLF from all 3 sample populations. Twelve probes (11 unique genes) were significantly differentially expressed across control-asymptomatic, 56 probes (56 unique genes) across control-affected, and 147 probes (140 unique genes) across asymptomatic-affected by this criterion.

**RT-PCR Validation of Microarray Data.** Starting with 500 ng of total RNA, cDNA syntheses were accomplished as above with Random Primers (Invitrogen) and SuperScript II (Invitrogen) in 20- $\mu$ l reactions. TaqMan Gene Expression Assays (Applied Biosystems) for each sample were performed in duplicate in 96-well optical plates on cDNA equivalent to 100 ng of total RNA. The 20- $\mu$ l reactions contained 5.0  $\mu$ l nuclease-free water, 10.0  $\mu$ l 2 $\times$  TaqMan Universal PCR Master Mix (Applied Biosystems), 1.0  $\mu$ l 20 $\times$  TaqMan Gene Expression Assay Mix (consisting of unlabeled PCR primers and FAM dye-labeled MGB probe; Applied Biosystems), and 4.0  $\mu$ l cDNA. For each gene, one no-target control, with no cDNA, was also performed. Thermal cycling conditions were 2 min at 50 °C and 10 min at 95 °C, followed by 40 cycles at 95 °C for 15 seconds and 60 °C for 1 min. Data were collected using the ABI PRISM 7900HT Sequence Detection System (Applied Biosystems) and were analyzed through comparative  $C_T$  method ( $\Delta\Delta C_T$ ).  $\beta$ -actin was used as an endogenous control as it was not observed as differentially expressed among the 3 groups (affected, asymptomatic, and control) according to microarray data.

1. Haslett JN, et al. (2002) Gene expression comparison of biopsies from Duchenne muscular dystrophy (DMD) and normal skeletal muscle. *Proc Natl Acad Sci USA* 99:15000–15005.

2. Zhao Q, et al. (2002) Identification of genes expressed with temporal-spatial restriction to developing cerebellar neuron precursors by a functional genomic approach. *Proc Natl Acad Sci USA* 99:5704–5709.

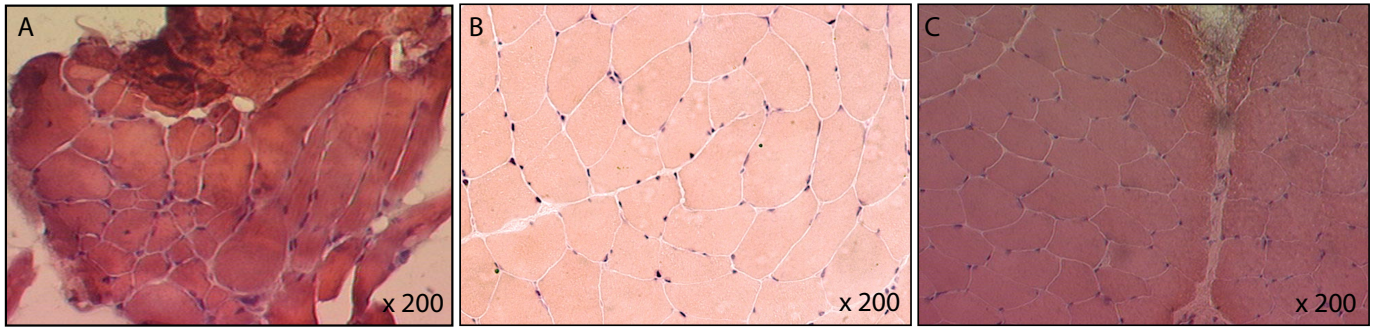

**Fig. S1.** Muscle tissues from biopsies stained with Hematoxylin & Eosin, in which we can observe nonspecific histological features of muscular dystrophy, such as variability of fiber sizes with atrophy, centralized nuclei, splitting, fibrosis in affected patient (A), and relatively normal histology in asymptomatic carrier (B) and normal control (C).

**Table S1. Expression fold-changes of significantly upregulated genes in affected vs. asymptomatic**

| Probe set   | Symbol   | Loci          | Fold-change (affected/asymptomatic) |
|-------------|----------|---------------|-------------------------------------|
| 204639_at   | ADA      | 20q12-q13.11  | 4.17                                |
| 208937_s_at | ID1      | 20q11         | 3.80                                |
| 227337_at   | ANKRD37  | 4q35.1        | 3.35                                |
| 209118_s_at | TUBA3    | 12q12-12q14.3 | 2.97                                |
| 223391_at   | SGPP1    | 14q23.2       | 2.61                                |
| 202458_at   | PRSS23   | 11q14.1       | 2.60                                |
| 44783_s_at  | HEY1     | 8q21          | 2.58                                |
| 219197_s_at | SCUBE2   | 11p15.3       | 2.40                                |
| 226077_at   | FLJ31951 | 5q33.3        | 2.40                                |
| 200947_s_at | GLUD1    | 10q23.3       | 2.35                                |
| 205794_s_at | NOVA1    | 14q           | 2.24                                |
| 224827_at   | UBTD2    | 5q35.1        | 2.20                                |
| 227029_at   | C14orf24 | 14q13.2       | 2.08                                |

Table S2. Expression fold-changes of significantly downregulated genes in affected vs. asymptomatic

| Probe set    | Symbol    | Loci            | Fold-change (affected/asymptomatic) |
|--------------|-----------|-----------------|-------------------------------------|
| 210163_at    | CXCL11    | 4q21.2          | 0.08                                |
| 240453_at    | C20orf26  | 20p11.23        | 0.09                                |
| 210797_s_at  | OASL      | 12q24.2         | 0.09                                |
| 1560750_at   | LOC151121 | 2q21.1          | 0.09                                |
| 230331_at    | LOC196541 | 13q33.1         | 0.09                                |
| 1569112_at   | SLC44A5   | 1p31.1          | 0.09                                |
| 1552779_a_at | SLC44A5   | 1p31.1          | 0.11                                |
| 227262_at    | HAPLN3    | 15q26.1         | 0.12                                |
| 220340_at    | KIAA1772  | 18q11.1-q11.2   | 0.12                                |
| 211122_s_at  | CXCL11    | 4q21.2          | 0.12                                |
| 205890_s_at  | UBD       | 6p21.3          | 0.12                                |
| 1558705_at   | ATOH8     | 2p11.2          | 0.12                                |
| 244106_at    | KCNQ5     | 6q14            | 0.13                                |
| 235504_at    | GREM2     | 1q43            | 0.13                                |
| 239465_at    | UQCRC2    | 16p12           | 0.14                                |
| 205660_at    | OASL      | 12q24.2         | 0.14                                |
| 233613_x_at  | REXO2     | 11q23.1-q23.2   | 0.14                                |
| 236108_at    | KIAA1632  | 18q12.3-q21.1   | 0.15                                |
| 211807_x_at  | PCDHGB5   | 5q31            | 0.15                                |
| 232469_x_at  | SSBP3     | 1p32.3          | 0.15                                |
| 217141_at    | BTBD7     | 14q32.12-q32.13 | 0.15                                |
| 1553015_a_at | RECQL4    | 8q24.3          | 0.15                                |
| 233059_at    | KCNJ3     | 2q24.1          | 0.15                                |
| 232961_at    | DNAPT6    | 2q33.1          | 0.15                                |
| 241824_at    | FOSL2     | 2p23.3          | 0.15                                |
| 244670_at    | CDKL1     | 14q22.1         | 0.16                                |
| 208159_x_at  | DDX11     | 12p11           | 0.16                                |
| 1555385_at   | B4GALNT1  | 12q13.3         | 0.16                                |
| 235157_at    | PARP14    | 3q21.1          | 0.16                                |
| 222833_at    | AYTL1     | 16q12.2         | 0.16                                |
| 210536_s_at  | SPAM1     | 7q31.3          | 0.16                                |
| 1570227_at   | COQ9      | 16q13           | 0.17                                |
| 211194_s_at  | TP73L     | 3q28            | 0.17                                |
| 214671_s_at  | ABR       | 17p13.3         | 0.17                                |
| 215159_s_at  | NADK      | 1p36.33-p36.21  | 0.17                                |
| 221010_s_at  | SIRT5     | 6p23            | 0.17                                |
| 210443_x_at  | OGFR      | 20q13.3         | 0.17                                |
| 1553992_s_at | NBR2      | 17q21           | 0.17                                |
| 205067_at    | IL1B      | 2q14            | 0.17                                |
| 236897_at    | IL17RB    | 3p21.1          | 0.17                                |
| 238627_at    | TRAPPC2L  | 16q24.3         | 0.17                                |
| 229377_at    | GRTP1     | 13q34           | 0.17                                |
| 207348_s_at  | LIG3      | 17q11.2-q12     | 0.17                                |
| 233251_at    | STRBP     | 9q33.3          | 0.17                                |
| 233959_at    | LOC221442 | 6p21.1          | 0.18                                |
| 239373_at    | ARFGEF2   | 20q13.13        | 0.18                                |
| 1557595_at   | GINS2     | 16q24.1         | 0.18                                |
| 207306_at    | TCF15     | 20p13           | 0.18                                |
| 233981_at    | RCL1      | 9p24.1-p23      | 0.18                                |
| 238628_s_at  | TRAPPC2L  | 16q24.3         | 0.18                                |
| 39248_at     | AQP3      | 9p13            | 0.18                                |
| 1569930_at   | DCUN1D4   | 4q12            | 0.18                                |
| 232311_at    | B2M       | 15q21-q22.2     | 0.19                                |
| 207735_at    | RNF125    | 18q12.1         | 0.19                                |
| 233992_x_at  | ZNF445    | 3p21.32         | 0.19                                |
| 229617_x_at  | AP2A1     | 19q13.33        | 0.19                                |
| 1552326_a_at | CCDC11    | 18q21.1         | 0.19                                |
| 243682_at    | NCOR1     | 17p11.2         | 0.19                                |
| 217282_at    | MAN1A2    | 1p13            | 0.19                                |
| 236913_at    | C17orf45  | 17p11.2         | 0.19                                |
| 220476_s_at  | C1orf183  | 1p13.2          | 0.19                                |
| 232767_at    | IGSF4     | 11q23.2         | 0.19                                |
| 231985_at    | MICAL3    | 22q11.21        | 0.19                                |
| 232612_s_at  | ATG16L1   | 2q37.1          | 0.19                                |

| Probe set    | Symbol        | Loci            | Fold-change (affected/asymptomatic) |
|--------------|---------------|-----------------|-------------------------------------|
| 213889_at    | PIGL          | 17p12-p11.2     | 0.19                                |
| 216629_at    | SRRM2         | 16p13.3         | 0.19                                |
| 203276_at    | LMNB1         | 5q23.3-q31.1    | 0.19                                |
| 1558340_at   | DIXDC1        | 11q23.1         | 0.19                                |
| 1555464_at   | IFIH1         | 2p24.3-q24.3    | 0.20                                |
| 229286_at    | MAGEE1        | Xq13.3          | 0.20                                |
| 200879_s_at  | EPAS1         | 2p21-p16        | 0.20                                |
| 207978_s_at  | NR4A3         | 9q22            | 0.20                                |
| 223859_at    | EPB41L4B      | 9q31-q32        | 0.20                                |
| 238594_x_at  | DUSP8         | 11p15.5         | 0.20                                |
| 211818_s_at  | PDE4C         | 19p13.11        | 0.20                                |
| 205714_s_at  | ZMYND10       | 3p21.3          | 0.20                                |
| 1557690_x_at | NPAS2         | 2q11.2          | 0.20                                |
| 213748_at    | TRIM66        | 11p15.4         | 0.20                                |
| 1565759_at   | RPL13         | 16q24.3 17p11.2 | 0.20                                |
| 225777_at    | C9orf140      | 9q34.3          | 0.20                                |
| 227513_s_at  | LRRFIP1       | 2q37.3          | 0.21                                |
| 243874_at    | LPP           | 3q28            | 0.21                                |
| 1568702_a_at | WDR71         | 11q13.4         | 0.21                                |
| 214095_at    | SHMT2         | 12q12-q14       | 0.21                                |
| 211135_x_at  | LILRB2        | 19q13.4         | 0.21                                |
| 232629_at    | PROK2         | 3p21.1          | 0.21                                |
| 236274_at    | EIF359        | 7p22.2          | 0.21                                |
| 222963_s_at  | IL1RAPL1      | Xp22.1-p21.3    | 0.21                                |
| 207319_s_at  | CDC2L5        | 7p13            | 0.21                                |
| 203439_s_at  | STC2          | 5q35.2          | 0.21                                |
| 1565935_at   | LOC91431      | 4q25            | 0.22                                |
| 1570414_x_at | FLJ13197      | 4p14            | 0.22                                |
| 224556_s_at  | LHX6          | 9q33.2          | 0.22                                |
| 216968_at    | MASP2         | 1p36.3-p36.2    | 0.22                                |
| 213403_at    | MGC11332      | 2q12.1          | 0.22                                |
| 215607_x_at  | SMEK1         | 14q32.12        | 0.22                                |
| 235776_x_at  | LOC389772     | -               | 0.22                                |
| 238127_at    | GAS6          | 13q34           | 0.22                                |
| 1564242_at   | TRPM2         | 21q22.3         | 0.22                                |
| 237583_at    | LOC399978     | 11q24.3         | 0.22                                |
| 232319_at    | GGPS1         | 1q43            | 0.22                                |
| 238581_at    | GBP5          | 1p22.2          | 0.23                                |
| 206356_s_at  | GNAL          | 18p11.22-p11.21 | 0.23                                |
| 232588_at    | STAG1         | 3q22.3          | 0.23                                |
| 220873_at    | REPS2         | Xp22.2          | 0.23                                |
| 234525_at    | DKFZP761C1711 | -               | 0.23                                |
| 216026_s_at  | POLE          | 12q24.3         | 0.23                                |
| 228230_at    | PRIC285       | 20q13.33        | 0.23                                |
| 1565436_s_at | MLL           | 11q23           | 0.23                                |
| 213006_at    | CEBPD         | 8p11.2-p11.1    | 0.23                                |
| 1570541_s_at | LOC400759     | 1p22.2          | 0.23                                |
| 214511_x_at  | FCGR1A        | 1q21.2-q21.3    | 0.23                                |
| 219324_at    | NOL12         | 22q13.1         | 0.24                                |
| 240509_s_at  | GREM2         | 1q43            | 0.24                                |
| 212523_s_at  | KIAA0146      | 8q11.21         | 0.24                                |
| 232711_at    | PKNOX2        | 11q24.2         | 0.24                                |
| 228439_at    | BATF2         | 11q13.1         | 0.24                                |
| 213983_s_at  | SCC-112       | 4p14            | 0.24                                |
| 222595_s_at  | DIDO1         | 20q13.33        | 0.24                                |
| 39549_at     | NPAS2         | 2q11.2          | 0.24                                |
| 207999_s_at  | ADARB1        | 21q22.3         | 0.25                                |
| 223820_at    | RBP5          | 12p13.31        | 0.25                                |
| 204769_s_at  | TAP2          | 6p21.3          | 0.25                                |
| 227675_at    | LRSAM1        | 9q33.3-q34.11   | 0.26                                |
| 219776_s_at  | FLJ11125      | 8p21.2          | 0.26                                |
| 206610_s_at  | F11           | 4q35            | 0.27                                |
| 220097_s_at  | TMEM104       | 17q25.1         | 0.28                                |
| 232753_at    | ZNF346        | 5q35.2          | 0.28                                |
| 222937_s_at  | MMP28         | 17q11-q21.1     | 0.28                                |

| Probe set   | Symbol    | Loci          | Fold-change (affected/asymptomatic) |
|-------------|-----------|---------------|-------------------------------------|
| 226130_at   | LOC441876 | 1p36.21       | 0.29                                |
| 204918_s_at | MLLT3     | 9p22          | 0.30                                |
| 238919_at   | PCDH9     | 13q14.3-q21.1 | 0.34                                |
| 51146_at    | PIGV      | 1p36.11       | 0.35                                |
| 206561_s_at | AKR1B10   | 7q33          | 0.49                                |

**Table S3. Expression fold-changes of significantly up-regulated genes in affected vs. control**

| Probe set    | Symbol   | Loci     | Fold-change (affected/control) |
|--------------|----------|----------|--------------------------------|
| 217022_s_at  | IGHA1    | 14q32.33 | 19.98                          |
| 206717_at    | MYH8     | 17p13.1  | 6.41                           |
| 213247_at    | SVEP1    | 9q32     | 5.73                           |
| 213502_x_at  | LOC91316 | 22q11.23 | 5.20                           |
| 226818_at    | MPEG1    | 11q12.1  | 4.06                           |
| 229800_at    | DCAMKL1  | 13q13    | 3.96                           |
| 202149_at    | NEDD9    | 6p25-p24 | 3.11                           |
| 232304_at    | PELI1    | 2p13.3   | 3.02                           |
| 1557905_s_at | CD44     | 11p13    | 2.98                           |
| 205794_s_at  | NOVA1    | 14q      | 2.94                           |
| 226621_at    | OSMR     | 5p13.1   | 2.91                           |
| 217478_s_at  | HLA-DMA  | 6p21.3   | 2.85                           |
| 203088_at    | FBLN5    | 14q32.1  | 2.67                           |
| 221031_s_at  | APOLD1   | 12p13.1  | 2.44                           |
| 212412_at    | PDLIM5   | 4q22     | 2.36                           |
| 201005_at    | CD9      | 12p13.3  | 2.23                           |
| 222816_s_at  | ZCCHC2   | 18q21.33 | 2.21                           |
| 225464_at    | FRMD6    | 14q22.1  | 2.12                           |
| 208319_s_at  | RBM3     | Xp11.2   | 2.02                           |
| 214946_x_at  | FAM21C   | 10q11.1  | 2.00                           |

**Table S4. Expression fold-changes of significantly down-regulated genes in affected vs. control**

| Probe set    | Symbol    | Loci             | Fold-change (affected/control) |
|--------------|-----------|------------------|--------------------------------|
| 230331_at    | LOC196541 | 13q33.1          | 0.04                           |
| 232185_at    | C20orf132 | 20q11.22         | 0.15                           |
| 1558331_at   | SIRT2     | 19q13            | 0.16                           |
| 243816_at    | ZNF70     | 22q11.2 22q11.23 | 0.17                           |
| 208159_x_at  | DDX11     | 12p11            | 0.17                           |
| 205232_s_at  | PAFAH2    | 1p34.3           | 0.17                           |
| 229377_at    | GRTP1     | 13q34            | 0.17                           |
| 240016_at    | SENP6     | 6q13-q14.3       | 0.17                           |
| 214095_at    | SHMT2     | 12q12-q14        | 0.17                           |
| 219241_x_at  | SSH3      | 11q13.1          | 0.17                           |
| 216026_s_at  | POLE      | 12q24.3          | 0.18                           |
| 213889_at    | PIGL      | 17p12-p11.2      | 0.18                           |
| 215781_s_at  | TOP3B     | 22q11.22         | 0.19                           |
| 1555385_at   | B4GALNT1  | 12q13.3          | 0.19                           |
| 206395_at    | DGKG      | 3q27-q28         | 0.20                           |
| 232612_s_at  | ATG16L1   | 2q37.1           | 0.20                           |
| 215554_at    | GPLD1     | 6p22.3-p22.2     | 0.20                           |
| 200879_s_at  | EPAS1     | 2p21-p16         | 0.21                           |
| 219324_at    | NOL12     | 22q13.1          | 0.23                           |
| 215099_s_at  | RXRB      | 6p21.3           | 0.23                           |
| 1570414_x_at | FLJ13197  | 4p14             | 0.24                           |
| 222595_s_at  | DIDO1     | 20q13.33         | 0.24                           |
| 211807_x_at  | PCDHGB5   | 5q31             | 0.24                           |
| 212996_s_at  | URB1      | 21q22.11         | 0.24                           |
| 1558705_at   | ATOH8     | 2p11.2           | 0.24                           |
| 215607_x_at  | SMEK1     | 14q32.12         | 0.24                           |
| 235983_at    | TRAK2     | 2q33             | 0.24                           |
| 213403_at    | MGC11332  | 2q12.1           | 0.25                           |
| 232469_x_at  | SSBP3     | 1p32.3           | 0.26                           |
| 1568702_a_at | WDR71     | 11q13.4          | 0.26                           |
| 1570227_at   | COQ9      | 16q13            | 0.29                           |
| 233613_x_at  | REXO2     | 11q23.1-q23.2    | 0.29                           |
| 232753_at    | ZNF346    | 5q35.2           | 0.30                           |
| 1565759_at   | RPL13     | 16q24.3 17p11.2  | 0.33                           |
| 51146_at     | PIGV      | 1p36.11          | 0.36                           |
| 238919_at    | PCDH9     | 13q14.3-q21.1    | 0.40                           |



Table S5. Expression of genes from 4q35

| Probe set             | Gene           | Name                       | Fold-change (asy/cont) | Fold-change (asy/aff) | Fold-change (aff/cont) |
|-----------------------|----------------|----------------------------|------------------------|-----------------------|------------------------|
| 216473_x_at 208201_at | <i>DUX4</i>    | Double homeobox, 4         | No call                | No call               | No call                |
| 234830_at             | <i>FRG2</i>    | FSHD region gene 2 protein | No call                | No call               | No call                |
| 204145_at             | <i>FRG1</i>    | FSHD region gene 1         | -1.07                  | -1.08                 | 1.01                   |
| 235535_x_at           | <i>FRG1</i>    | FSHD region gene 1         | 1.65                   | 1.67                  | -1.01                  |
| 206610_s_at           | <i>F11</i>     | Coagulation factor XI      | 1.82                   | <u>3.71</u>           | -2.04                  |
| 210170_at             | <i>PDLIM3</i>  | PDZ and LIM domain 3       | -1.23                  | -1.47                 | 1.19                   |
| 238592_at             | <i>PDLIM3</i>  | PDZ and LIM domain 3       | -1.08                  | -1.23                 | 1.14                   |
| 209621_s_at           | <i>PDLIM3</i>  | PDZ and LIM domain 3       | -1.24                  | -1.19                 | -1.05                  |
| 227337_at             | <i>ANKRD37</i> | Ankyrin repeat domain 37   | -1.22                  | <u>-3.35</u>          | 2.76                   |
| 202825_at             | <i>ANT1</i>    | Solute carrier family 25   | -1.09                  | -1.34                 | 1.23                   |

Underlined fold-changes represent those deemed significant.

**Table S6. Expression fold-change in affected and asymptomatic carriers relative to healthy controls**

| Gene            | Fold-change: affected ( <i>n</i> = 4) | Fold-change: asymptomatic ( <i>n</i> = 6) |
|-----------------|---------------------------------------|-------------------------------------------|
| <i>CXCL9</i>    | 8.2 (2.7–24.8)                        | 3.7 (0.8–18.1)                            |
| <i>CXCL10</i>   | 2.3 (1.3–4.2)                         | 4.3 (0.6–31.7)                            |
| <i>CXCL11</i>   | 2.9 (1.0–7.9)                         | 2.2 (0.3–14.2)                            |
| <i>STATH</i>    | 386.0 (22.6–6,579.3)                  | 501.8 (142.0–1,773.0)                     |
| <i>LOC91431</i> | 1.5 (0.5–4.6)                         | 2.0 (0.9–4.5)                             |
| <i>PRIC285</i>  | 0.5 (0.1–2.4)                         | 0.7 (0.2–2.6)                             |
| <i>LPP</i>      | 2.1 (0.6–6.9)                         | 1.7 (0.6–4.3)                             |

Additional samples from affected and unrelated asymptomatic carriers were included in the analysis.

**Table S7. Muscle specimens available for the present study**

| Family | Sample | Diagnosis            | Age/Gender<br>(year) | Onset<br>(year) | N° D4Z4<br>repeats | Muscle<br>weakness | Other<br>features | CK (IU/l) | Muscle  |
|--------|--------|----------------------|----------------------|-----------------|--------------------|--------------------|-------------------|-----------|---------|
| 1      | 1      | Affected             | 49/M                 | 16              | 5                  | F,S,P,A            | -                 | 617.5     | Biceps  |
|        | 2      | Asymptomatic carrier | 69/F                 | -               | 5                  | -                  | -                 | ND        | Biceps  |
|        | 3      | Normal control       | 41/F                 | -               | -                  | -                  | -                 | 72.5      | Biceps  |
| 2      | 4      | Affected             | 30/M                 | 15              | 2                  | F,S,P,A            | H                 | 11        | Deltoid |
|        | 5      | Asymptomatic carrier | 66/M                 | -               | 2                  | -                  | -                 | 4         | Deltoid |
|        | 6      | Normal control       | 38/F                 | -               | -                  | -                  | -                 | 2.9       | Deltoid |
| 3      | 7      | Affected             | 14/F                 | 7               | 3                  | F,S                | D                 | 94.5      | Deltoid |
|        | 8      | Asymptomatic carrier | 32/F                 | -               | 3                  | -                  | -                 | 6.2       | Deltoid |
|        | 9      | Normal control       | 35/F                 | -               | -                  | -                  | -                 | 81        | Deltoid |
| 4      | 10     | Affected             | 11/M                 | 6               | 5                  | F,S,P              | L                 | 230.9     | Biceps  |
|        | 11     | Asymptomatic carrier | 54/M                 | -               | 5                  | -                  | -                 | 8.6       | Biceps  |
|        | 12     | Normal control       | 16/M                 | -               | -                  | -                  | -                 | 9.1       | Biceps  |
| 5      | 13     | Affected             | 38/M                 | 21              | 8                  | S,P                | -                 | 16        | Biceps  |
|        | 14     | Asymptomatic carrier | 57/F                 | -               | 8                  | -                  | -                 | 8.8       | Biceps  |
|        | 15     | Normal control       | 39/M                 | -               | -                  | -                  | -                 | 10        | Biceps  |
| 6      | 16     | Asymptomatic carrier | 40/F                 | -               | 8                  | -                  | -                 | ND        | Biceps  |
| 7      | 17     | Asymptomatic carrier | 45/F                 | -               | 9                  | -                  | -                 | 9.3       | Biceps  |
| 8      | 18     | Affected             | 57/F                 | ND              | 6                  | S                  | D                 | 12.3      | Biceps  |
| 9      | 19     | Asymptomatic carrier | 51/F                 | -               | 8                  | -                  | -                 | 5.2       | Biceps  |
| 10     | 20     | Asymptomatic carrier | 46/F                 | -               | 5                  | -                  | -                 | 13.0      | Biceps  |

A, ankle; D, depression; F, face; H, hearing loss; L, swallowing problem; ND, not described; P, pelvic girdle; S, shoulder girdle.

**Table S8. miRNA:mRNA predicted targeting in FSHD**

| miRNA:mRNA         | miRNA fold-change | Target fold-change | MAMI score |
|--------------------|-------------------|--------------------|------------|
| miR-19b: TRAK2     | 2.99              | -4.09              | 0.67303    |
| miR-19b: B4GALNT1  | 2.99              | -5.17              | 0.50875    |
| miR-17-3p: SMEK1   | 1.81              | -4.14              | 0.41443    |
| miR-18a: REXO2     | 2.24              | -3.49              | 0.20708    |
| let-7b: ATG16L1    | 1.65              | -5.02              | 0.11277    |
| let-7c: ATG16L1    | 1.69              | -5.02              | 0.11277    |
| let-7e: ATG16L1    | 1.77              | -5.02              | 0.11277    |
| let-7i: ATG16L1    | 1.86              | -5.02              | 0.11277    |
| miR-106a: ATG16L1  | 2.11              | -5.02              | 0.11277    |
| miR-106a: EPAS1    | 2.11              | -4.75              | 0.11277    |
| miR-106b: ATG16L1  | 3.04              | -5.02              | 0.11277    |
| miR-106b: EPAS1    | 3.04              | -4.75              | 0.11277    |
| miR-125a: ATOH8    | 1.83              | -4.15              | 0.11277    |
| miR-130a: ATG16L1  | 3.02              | -5.02              | 0.11277    |
| miR-130b: ATG16L1  | 2.03              | -5.02              | 0.11277    |
| miR-152: EPAS1     | 1.54              | -4.75              | 0.11277    |
| miR-155: PCDH9     | 4.4               | -2.5               | 0.11277    |
| miR-15a: PCDH9     | 2.53              | -2.5               | 0.11277    |
| miR-16: PCDH9      | 1.77              | -2.5               | 0.11277    |
| miR-17-5p: ATG16L1 | 2.12              | -5.02              | 0.11277    |
| miR-17-5p: EPAS1   | 2.12              | -4.75              | 0.11277    |
| miR-195: PCDH9     | 2.62              | -2.5               | 0.11277    |
| miR-199a*: RXRB    | 2.83              | -4.31              | 0.11277    |
| miR-19b: ATG16L1   | 2.99              | -5.02              | 0.11277    |
| miR-20a: ATG16L1   | 2.13              | -5.02              | 0.11277    |
| miR-20a: EPAS1     | 2.13              | -4.75              | 0.11277    |
| miR-20b: ATG16L1   | 2.47              | -5.02              | 0.11277    |
| miR-20b: EPAS1     | 2.47              | -4.75              | 0.11277    |
| miR-93: EPAS1      | 2.03              | -4.75              | 0.11277    |
| let-7b: PIGV       | 1.65              | -2.76              | 0.09432    |
| let-7i: COQ9       | 1.86              | -3.5               | 0.09432    |
| miR-140: COQ9      | 2.31              | -3.5               | 0.09432    |
| miR-140: RPL13     | 2.31              | -3.07              | 0.09432    |
| miR-154: COQ9      | 2.2               | -3.5               | 0.09432    |
| miR-199b: PIGL     | 3.41              | -5.48              | 0.09432    |
| miR-29a: RPL13     | 2.57              | -3.07              | 0.09432    |
| miR-29a: ZNF346    | 2.57              | -3.33              | 0.09432    |
| miR-29b: RPL13     | 2.47              | -3.07              | 0.09432    |
| miR-29b: ZNF346    | 2.47              | -3.33              | 0.09432    |
| miR-34a: DIDO1     | 5.56              | -4.19              | 0.09432    |
